# Supplementary material
Source: HighWire-hosted journal article supplement (https://cmaj.ca/highwire/filestream/150661/field_highwire_adjunct_files/4/231419-res-5-at.pdf)
Supplement: 231419-res-5-at.pdf [file 231419-res-5-at.pdf]

**Appendix V: Databases and codes used to identify palliative care settings**

| <b>Service</b>                    | <b>Database</b> | <b>Codes</b>                                                                                                                                                                                                                                                                                                                                                                                                                                                                                                                                                                                                                                                                                                                                                                                                                                                                                                                                                                                                                                                                                                                                                             |
|-----------------------------------|-----------------|--------------------------------------------------------------------------------------------------------------------------------------------------------------------------------------------------------------------------------------------------------------------------------------------------------------------------------------------------------------------------------------------------------------------------------------------------------------------------------------------------------------------------------------------------------------------------------------------------------------------------------------------------------------------------------------------------------------------------------------------------------------------------------------------------------------------------------------------------------------------------------------------------------------------------------------------------------------------------------------------------------------------------------------------------------------------------------------------------------------------------------------------------------------------------|
| <b>Clinic based palliative</b>    | OHIP            | <ul style="list-style-type: none"> <li>• A945 + OHIP location code "Office": Special palliative care consultation in clinic, office, home; minimum 50 min</li> <li>• K023 + OHIP location code "Office": Palliative care support in half hour increments; may be used to add time for longer consultations following a code for A945, or for any palliative care support visit. Exclude if patient is in hospital, long-term care (LTC), complex continuing care (CCC), or rehabilitation</li> <li>• K700: Palliative care outpatient case conference</li> </ul>                                                                                                                                                                                                                                                                                                                                                                                                                                                                                                                                                                                                         |
| <b>Home based palliative care</b> |                 |                                                                                                                                                                                                                                                                                                                                                                                                                                                                                                                                                                                                                                                                                                                                                                                                                                                                                                                                                                                                                                                                                                                                                                          |
| Home MD visits                    | OHIP            | <ul style="list-style-type: none"> <li>• B966: Travel premium for palliative care (billed with B998/B996)</li> <li>• B998: Home visit for palliative care between 07:00 and 24:00</li> <li>• B997: Home visit for palliative care between 24:00 and 07:00</li> <li>• A945 + OHIP location code "Home": Special palliative care consultation in clinic, office, home; minimum 50 min</li> <li>• K023 + OHIP location code "Home": Palliative Care Support (&gt;20 min.)</li> <li>• A901: House call Assessment (&lt; 20 min.)</li> <li>• A900: Complex House call Assessment</li> </ul> <p>Assign any physician billings from clinic based to home-based if includes attached special visit premiums for palliative care home visit: B966, B997, or B998 (e.g. A945 w/B966, K023 w/ B966). ). If there are multiple special visit codes billed for the same patient by the same physician on the same day, then this hierarchy will be used:</p> <ol style="list-style-type: none"> <li>1. Special visit premium hospital inpatient codes (most important)</li> <li>2. Special visit premium long-term care codes</li> <li>3. Special visit premium home codes</li> </ol> |
| Home Care (non-MD)                | RAI-Home Care   | <ul style="list-style-type: none"> <li>• P25 = 1 or 2: Hospice care was provided with complete or partial adherence</li> <li>• CC3f goals of care = palliative care</li> </ul>                                                                                                                                                                                                                                                                                                                                                                                                                                                                                                                                                                                                                                                                                                                                                                                                                                                                                                                                                                                           |

| <b>Service</b>                    | <b>Database</b> | <b>Codes</b>                                                                                                                                                                                                                                                                                                                                                                                                                                                                                                                                                                                                                                                                                                                                                                                                                                                                                                                                                                                                                                                                                                                                                                           |
|-----------------------------------|-----------------|----------------------------------------------------------------------------------------------------------------------------------------------------------------------------------------------------------------------------------------------------------------------------------------------------------------------------------------------------------------------------------------------------------------------------------------------------------------------------------------------------------------------------------------------------------------------------------------------------------------------------------------------------------------------------------------------------------------------------------------------------------------------------------------------------------------------------------------------------------------------------------------------------------------------------------------------------------------------------------------------------------------------------------------------------------------------------------------------------------------------------------------------------------------------------------------|
|                                   | HCD             | <ul style="list-style-type: none"> <li>• SRC_admission = 95 or 54: Service recipient code (i.e., classification) of end of life on admission</li> <li>• Service_RPC = 95 or 54: Service care goal of end of life; patient provided service under end-of-life designation</li> <li>• Residence_type = 2000: Staying in hospice or palliative care unit while receiving service</li> <li>• SRC_discharge = 95 or 54: Service recipient code of end of life on discharge</li> </ul>                                                                                                                                                                                                                                                                                                                                                                                                                                                                                                                                                                                                                                                                                                       |
| <b>Acute care palliative care</b> |                 |                                                                                                                                                                                                                                                                                                                                                                                                                                                                                                                                                                                                                                                                                                                                                                                                                                                                                                                                                                                                                                                                                                                                                                                        |
| Inpatient palliative care         | CIHI-DAD        | <ul style="list-style-type: none"> <li>• ICD-10 Code: Z51.5</li> <li>• PATSERV = 58: main patient service of “palliative care” was responsible for care</li> <li>• PRVSERV[1-8] or INSERV[1-20] = 00121: “palliative medicine” was a provider who provided service, or an intervention service code of palliative medicine was provided</li> </ul>                                                                                                                                                                                                                                                                                                                                                                                                                                                                                                                                                                                                                                                                                                                                                                                                                                     |
|                                   | OHIP            | <ul style="list-style-type: none"> <li>• A945 + OHIP location code “inpatient”</li> <li>• C945: Special palliative care consult, hospital (minimum 50 min)</li> <li>• C882: Family medicine palliative care, non-emergency (routine) hospital inpatient service, &lt;20 minutes</li> <li>• C982: Specialist palliative care, non-emergency (routine) hospital inpatient service, &lt;20minutes</li> <li>• K023 + OHIP location code “inpatient”: Palliative care support in half hour increments, if patient was in hospital during date of claim</li> </ul> <p>Assign any A945, C945 or k023 to inpatient if includes attached special visit premium hospital inpatient visit: C960, C961, C962, C963, C964, C990, C992, C994, C986, C996, C991, C993, C995, C999, C997 (e.g. A945 w/C960, k023 w/ C961). If there are multiple special visit codes billed for the same patient by the same physician on the same day, then this hierarchy will be used:</p> <ol style="list-style-type: none"> <li>1. Special visit premium hospital inpatient codes (most important)</li> <li>2. Special visit premium long-term care codes</li> <li>3. Special visit premium home codes</li> </ol> |

Appendix 5, as submitted by the authors. Appendix to: Lau J, Scott MM, Everett K, et al. Association between opioid use disorder and palliative care: a cohort study using linked health administrative data in Ontario, Canada. *CMAJ* 2024. doi: 10.1503/cmaj.231419. Copyright © 2024 The Author(s) or their employer(s). To receive this resource in an accessible format, please contact us at cmajgroup@cmaj.ca.

| <b>Service</b>                   | <b>Database</b> | <b>Codes</b>                                                                                                                                                                                                                                                                                                                                                                                                                                                                                                                                                                                                                                                                                                                                                                                                                                                                                                                                                                                                                                                                                                                                                                                                                                                |
|----------------------------------|-----------------|-------------------------------------------------------------------------------------------------------------------------------------------------------------------------------------------------------------------------------------------------------------------------------------------------------------------------------------------------------------------------------------------------------------------------------------------------------------------------------------------------------------------------------------------------------------------------------------------------------------------------------------------------------------------------------------------------------------------------------------------------------------------------------------------------------------------------------------------------------------------------------------------------------------------------------------------------------------------------------------------------------------------------------------------------------------------------------------------------------------------------------------------------------------------------------------------------------------------------------------------------------------|
|                                  | NACRS           | <ul style="list-style-type: none"> <li>• <i>PRVSERV [1-10] = 00121: Provider service code of palliative medicine</i></li> <li>• <i>CONSULTSERV1 to CONSULTSERV3 = 00121: Consult service of palliative medicine was called</i></li> </ul>                                                                                                                                                                                                                                                                                                                                                                                                                                                                                                                                                                                                                                                                                                                                                                                                                                                                                                                                                                                                                   |
| <b>Long-term care institutes</b> |                 | <ul style="list-style-type: none"> <li>• <i>W872: Family physician palliative care subsequent visit - Nursing home or home for the aged - Palliative Care</i></li> <li>• <i>W972: Specialist physician palliative care subsequent visit</i></li> <li>• <i>K023 + OHIP location code "LTC"</i></li> <li>• <i>W882: Family physician palliative care subsequent visit (&lt;20 min)- Chronic care or convalescent hospital - Palliative Care</i></li> <li>• <i>W982: Palliative Care Assessment (&lt;20 min) – Specialist, Chronic care/Convalescent</i></li> <li>• <i>K706: Convalescent care program case conference (per unit)</i></li> </ul> <p>Assign any A945, C945 or K023 to LTC if includes attached LTC special visit premium travel code: W960, W961, W962, W963, W964, W990, W992, W994, W998, W996, W991, W993, W995, W999, W997 (e.g. A945 w/W960, K023 w/ W960). ). If there are multiple special visit codes billed for the same patient by the same physician on the same day, then this hierarchy will be used:</p> <ol style="list-style-type: none"> <li>1. Special visit premium hospital inpatient codes (most important)</li> <li>2. Special visit premium long-term care codes</li> <li>3. Special visit premium home codes</li> </ol> |
|                                  | CCRS            | <ul style="list-style-type: none"> <li>• <i>CCRS_P1AO = 1: Received hospice care in last 14 days</i></li> </ul>                                                                                                                                                                                                                                                                                                                                                                                                                                                                                                                                                                                                                                                                                                                                                                                                                                                                                                                                                                                                                                                                                                                                             |

**Legend**

OHIP = Ontario Health Insurance Plan

CIHI-DAD = Canadian Institute for Health Information – Discharge Abstract Database

NACRS = National Ambulatory Care Reporting System

RAI = Residential Assessment Instrument

HCD = Home Care Data

CCRS = Continuing Care Reporting System
